# Supplementary material for: Interplay of IKK/NF-κB signaling in macrophages and myofibers promotes muscle degeneration in Duchenne muscular dystrophy
Source: JCI journal article supplement (doi:10.1172/jci30556), 2007-03-22
Supplement: sd1 [file 1]

Suppl. Figure 1

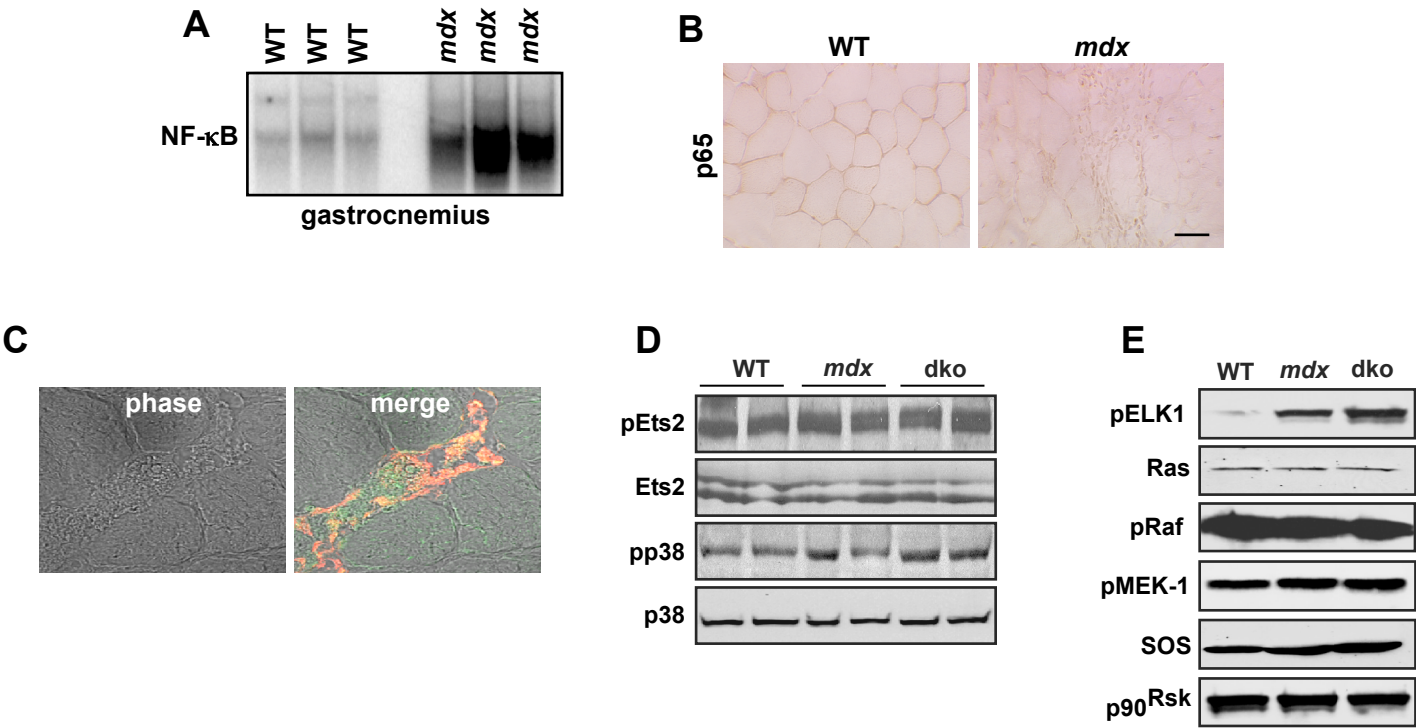

Suppl. Figure 2

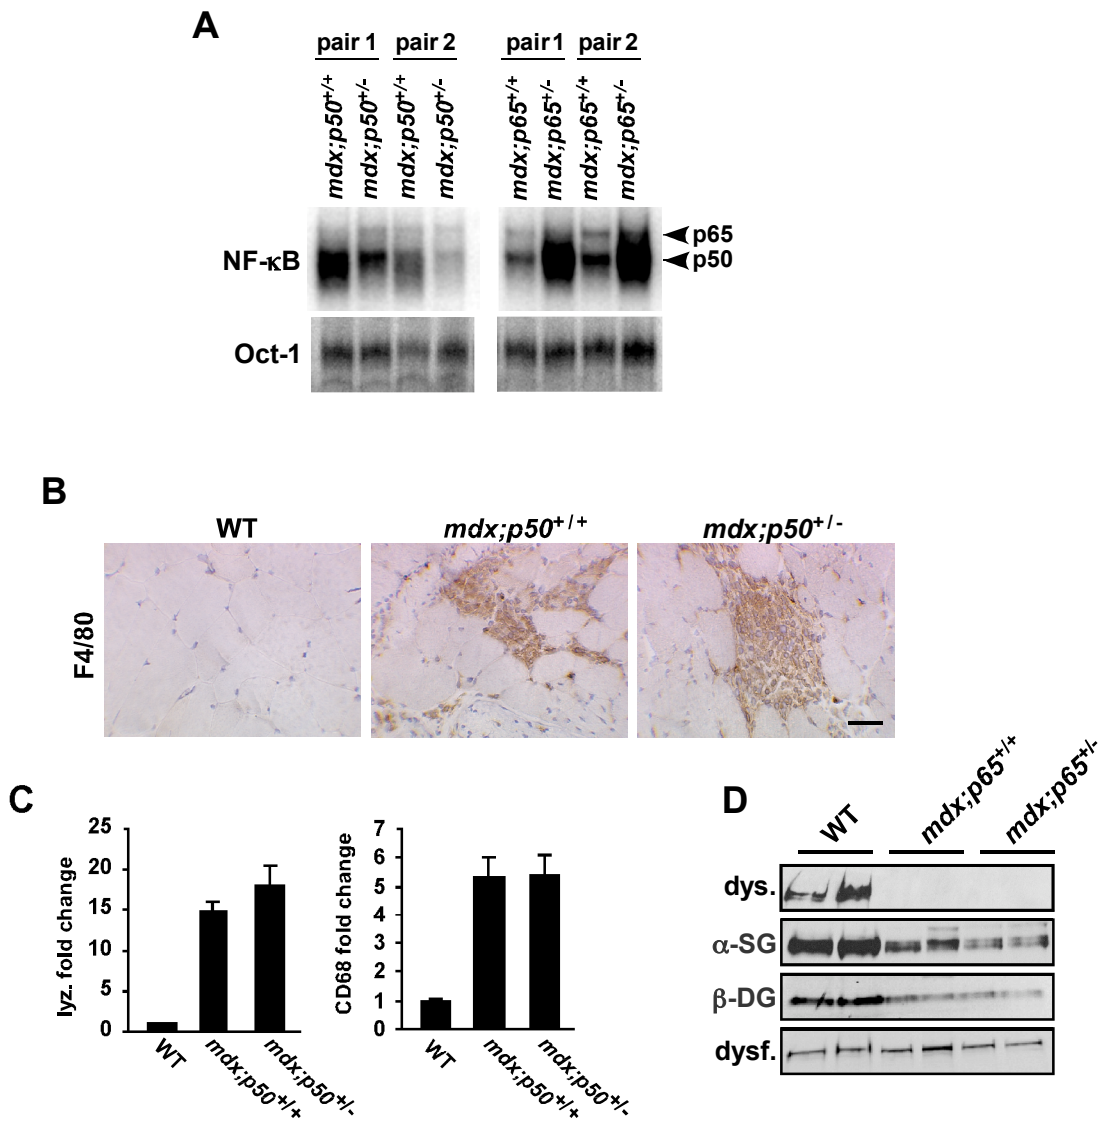

Suppl. Figure 3

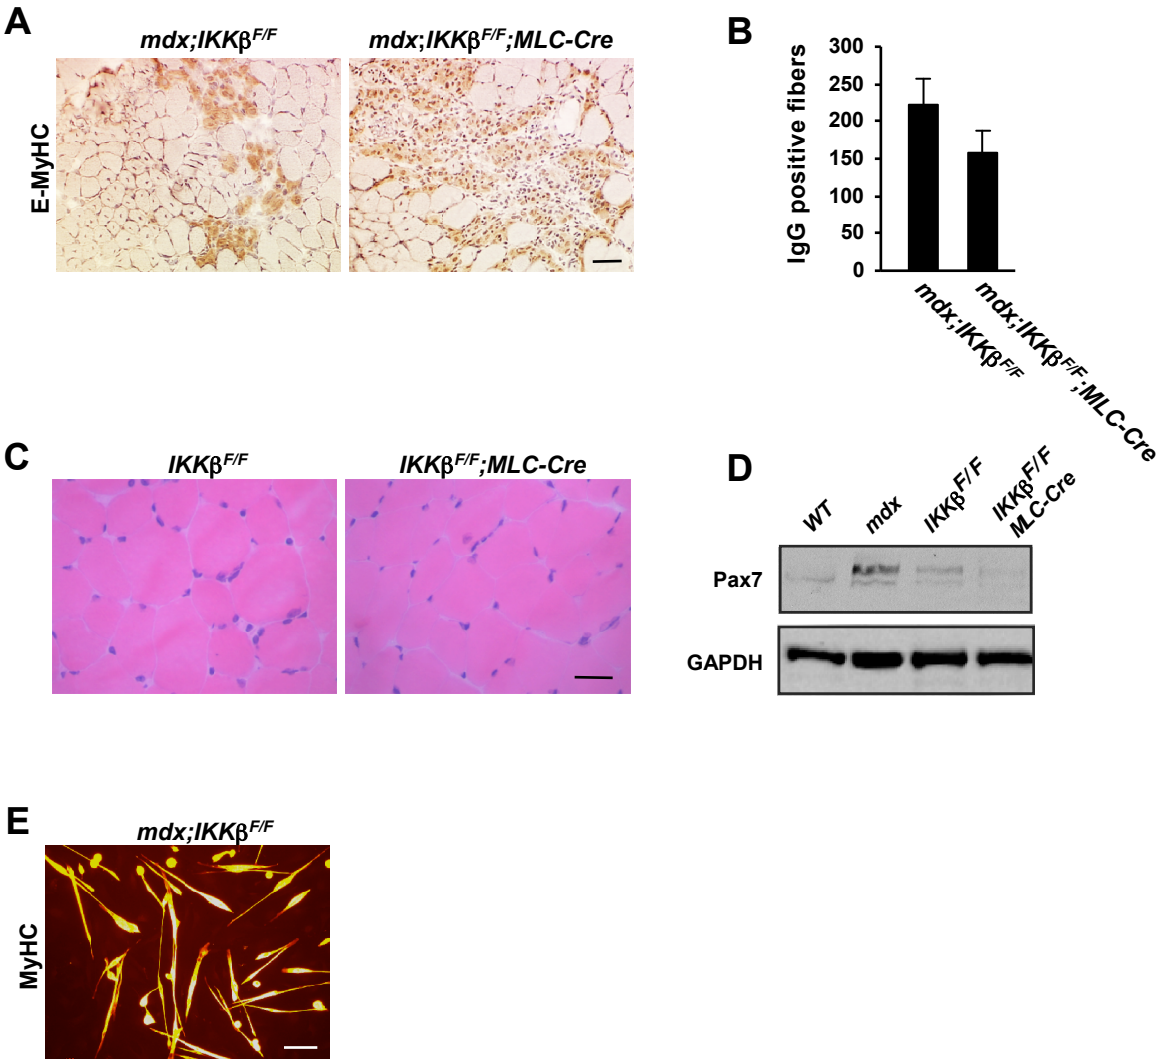

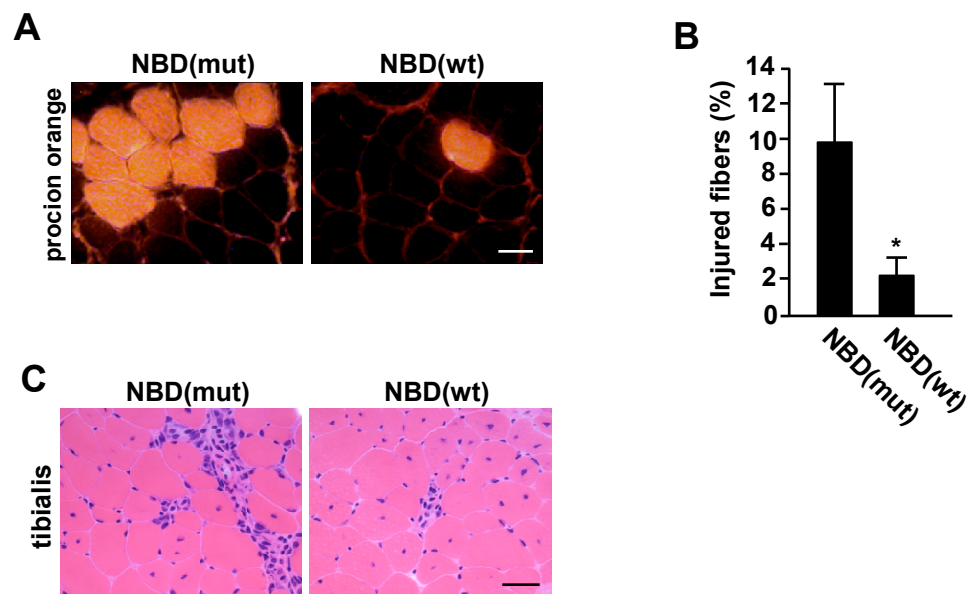

## **Peptide synthesis**

NBD peptide was generated using an ABI 430A solid-phase peptide synthesizer (Applied Biosystems, Foster City, Ca.) with standard tBOC (tert-butyloxycarbonyl)-chemistry. The peptides were cleaved from the resin and deprotected using hydrofluoric acid. The resulting crude materials were purified by HPLC on a Vydac (Vydac Separations, Hesperia, Ca) C18 preparative column using gradients of acetonitrile in 0.10% trifluoroacetic acid. Following lyophilization of the purified fractions, the expected molecular weight of the peptides were confirmed using matrix-assisted laser desorption ionization mass spectrometry.

## **Primers for Real-Time PCR**

CD68, 5'-ACAGGCAGCACAGTGGACATTC-3' forward, 5'-ATGAGAGGCAGCAAGAG-3' reverse; lysozyme, 5'-GTGGGATCAATTGCAGTGCT-3' forward, 5'-TCTCGGTTTTGACAGTGTGCT-3' reverse; TNF $\alpha$ , 5'-CCCAAAGGGATGAGAAGTTCCC-3' forward, 5'-CCTGGTATGAGATAGCA AATCGG-3' reverse; IL1 $\beta$ , 5'-CCAAAAGATGAAGGGCTGCTTCC-3' forward, 5'-GGATGGGCTCTTCTTCAAA GATG-3' reverse; MCP-1; 5'-GGCTCAGCCAGAT GCAGTTAACG-3' forward; 5'-GCTGAAGACCTTAGGGCAGATGC-3' reverse; RANTES, 5'-CTCACCATAGGC TCGGACA-3' forward; 5'-CCTCTGAGTGACAA ACACGA-3' reverse; and MIP-1 $\alpha$ , 5'-CAAGTCTTCTCAGCGCCATA-3' forward; 5'-GCAAAGGCTGCTGGTTTCAA-3' reverse. GAPDH primers 5'-GCAAATTCAA CGGCACAGTCAAG-3'

forward, 5'-GGTACAAACACTACCCACACTTG-3' reverse were used as internal controls.

**Supp. Fig. 1. Characterization of signaling pathways in *mdx* muscles**

**A.** EMSAs were performed from nuclear extracts prepared from gastrocnemius muscles harvested from 5-wk-old wt and *mdx* mice. **B.** Immunostaining was performed for total p65 comparing gastrocnemius sections from 7-wk-old WT or *mdx* mice. Scale bar denotes 50  $\mu$ m. **C.** Differential interference contrast of a muscle section from 4-wk-old *mdx* mice (left panel) or a merged image with pp65 (green) and CD68 (red). **D and E.** Western blot analysis was performed on tibialis muscle lysates prepared from the same mice as in (A) probing for Ets-2 and phospho-Ets2 (antibodies kindly provided by M. Ostrowski), p38 (1:500, Santa Cruz), phospho-p38 (1:500, Cell Signaling), phospho-Elk-1, phospho-Raf, MEK-1, and p90<sup>Rsk</sup> (1:1000, Cell Signaling), Ras (1:500, Calbiochem), and SOS (1:500, Upstate).

**Supp. Fig. 2. Effects on pathology in p65 and p50 heterozygous *mdx* mice.**

**A.** EMSAs were performed from nuclear extracts prepared from tibialis muscles harvested from 2 pairs of 5-wk-old *mdx;p50*<sup>+/+</sup> and *mdx;p50*<sup>+/-</sup> mice and *mdx;p65*<sup>+/+</sup> and *mdx;p65*<sup>+/-</sup> mice. **B.** Gastrocnemius muscle sections from *mdx;p50*<sup>+/+</sup> and *mdx;p50*<sup>+/-</sup> mice were immunostained with F4/80. Scale bar denotes 50  $\mu$ m. **B.** Real time PCR analysis for lysozyme and CD68 expression was performed on gastrocnemius muscles. **C.** Western blot analysis of DGC

associated proteins were performed comparing wt, *mdx;p65<sup>+/+</sup>*, and *mdx;p65<sup>+/-</sup>* mice.

**Supp. Fig. 3. Effects of muscle specific deletion of IKK $\beta$  in mdx and wild type mice.** A. E-MyHC staining in *mdx;IKK $\beta$ <sup>F/F</sup>* and *mdx;IKK $\beta$ <sup>F/F</sup>;MLC-Cre* gastrocnemius muscles. B. Quantitation analysis of IgG positive fibers from muscles used in A. C. H&E stained gastrocnemius cryosections from 4-wk-old *IKK $\beta$ <sup>F/F</sup>* and *IKK $\beta$ <sup>F/F</sup>;MLC-Cre* mice (n=3). Scale bar denotes 50  $\mu$ m. D. Western blot analysis of tibialis anterior muscle lysates from mice used in (C) to probe for Pax7 and  $\alpha$ -tubulin. E. CD34<sup>+</sup>, Sca-1<sup>-</sup> flow sorted cells from 4 wk-old *mdx;IKK $\beta$ <sup>F/F</sup>* mice were differentiated and stained for MyHC. Scale bar denotes 100  $\mu$ m.

**Supp. Fig. 4. NBD treatment in mdx mice ameliorates dystrophic phenotype.** A and B. Soleus muscles from 4-wk-old mice were treated with either wt or mut NBD. Dissected muscles were incubated with 0.2% procion orange (Sigma) in Kreb's Ringer solution for 1 hr. Muscles were washed, frozen, sectioned and then viewed by fluorescence microscopy to quantitatively measure myofiber injury (B, asterisk denotes p<0.05). C. H&E analysis of tibialis anterior muscles harvested from 50-day-old *mdx* mice injected with either mut or wt NBD peptide. Scale bar in A and C denote 50  $\mu$ m.
